# Supplementary material
Source: PubMed Central journal article supplement (PMC6645807)
Supplement: ao7b02023_si_001.pdf [file ao7b02023_si_001.pdf]

# **Salts of amoxapine with improved solubility for enhanced pharmaceutical applicability**

Mayank Joshi<sup>1</sup> and Angshuman Roy Choudhury<sup>1\*</sup>

<sup>1</sup>Department of Chemical Sciences, Indian Institute of Science Education and Research (IISER) Mohali, Sector 81, Knowledge City, S. A. S. Nagar, Manauli PO, Punjab, India 140306

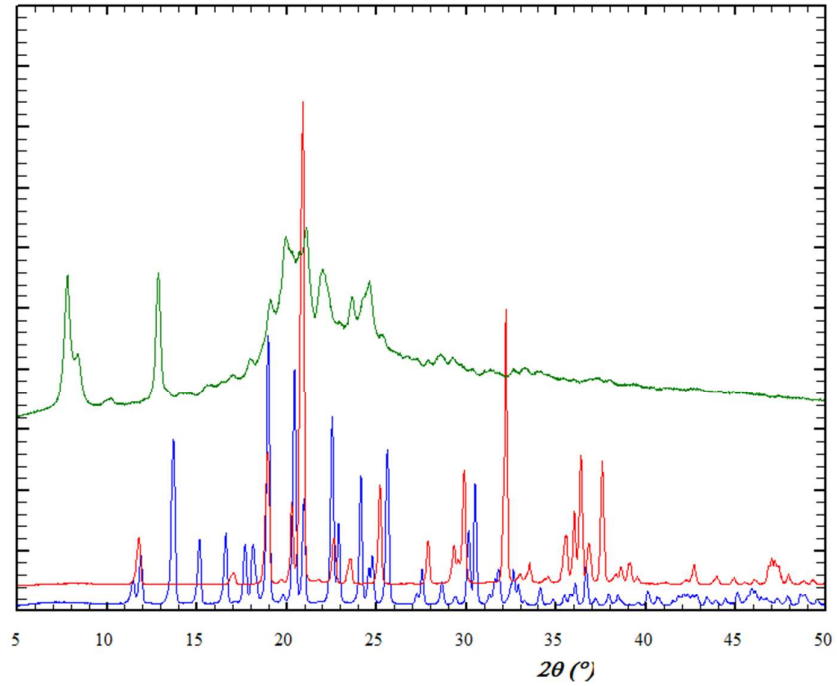

Figure S1: PXRD pattern of AMX (Blue), D(-)Tartaric acid (Red), AMX-D(-)Tartaric acid salt (Green)

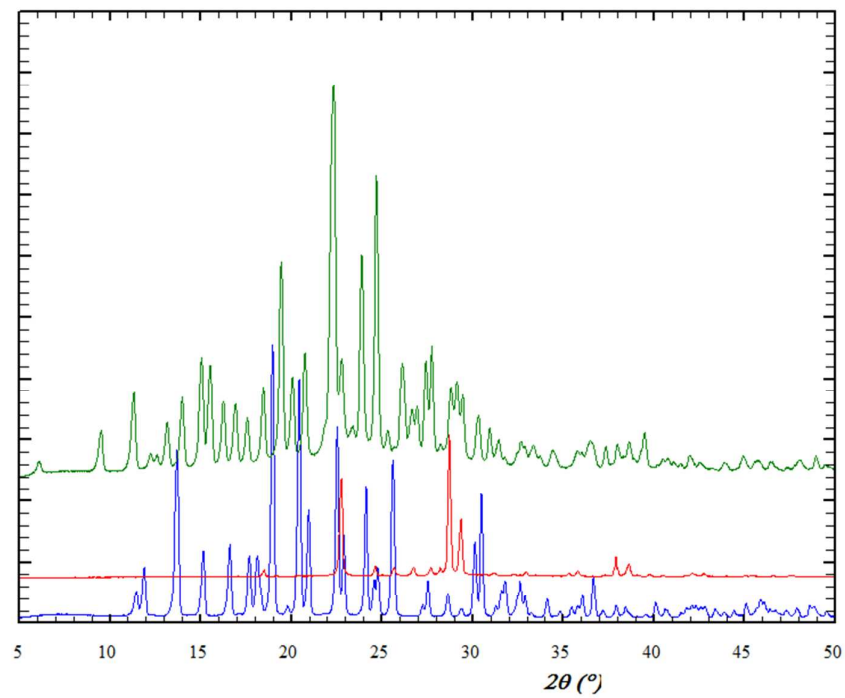

Figure S2: PXRD pattern of AMX (Blue), Fumaric acid (Red), AMX-Fumaric acid salt (Green)

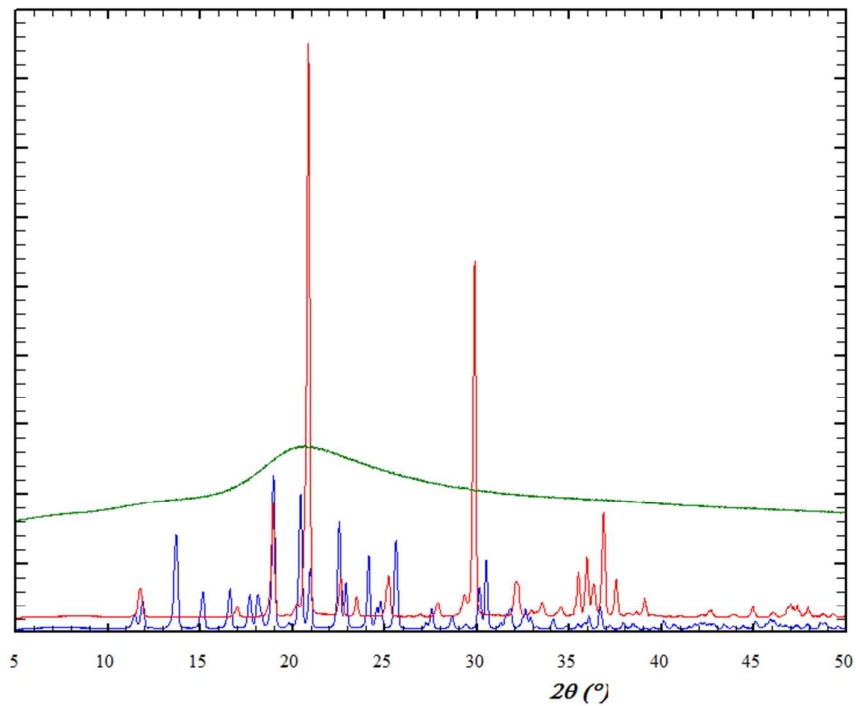

Figure S3: PXRD pattern of AMX (Blue), D(+)-Tartaric acid (Red), AMX-D(+)-Tartaric acid salt (Green)

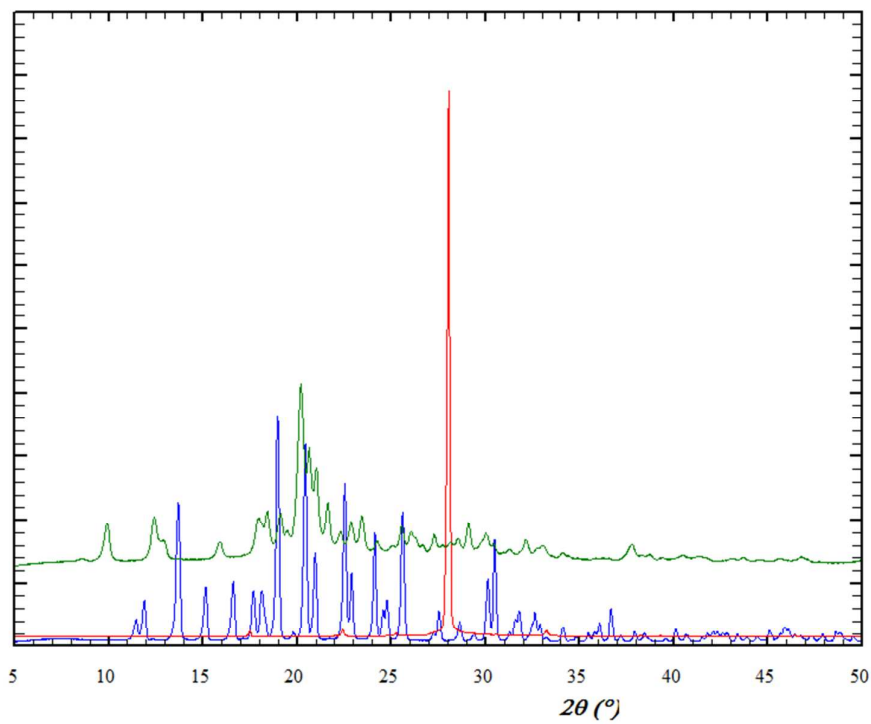

Figure S4: PXRD pattern of AMX (Blue), Maleic acid (Red), AMX-Maleic acid salt (Green)

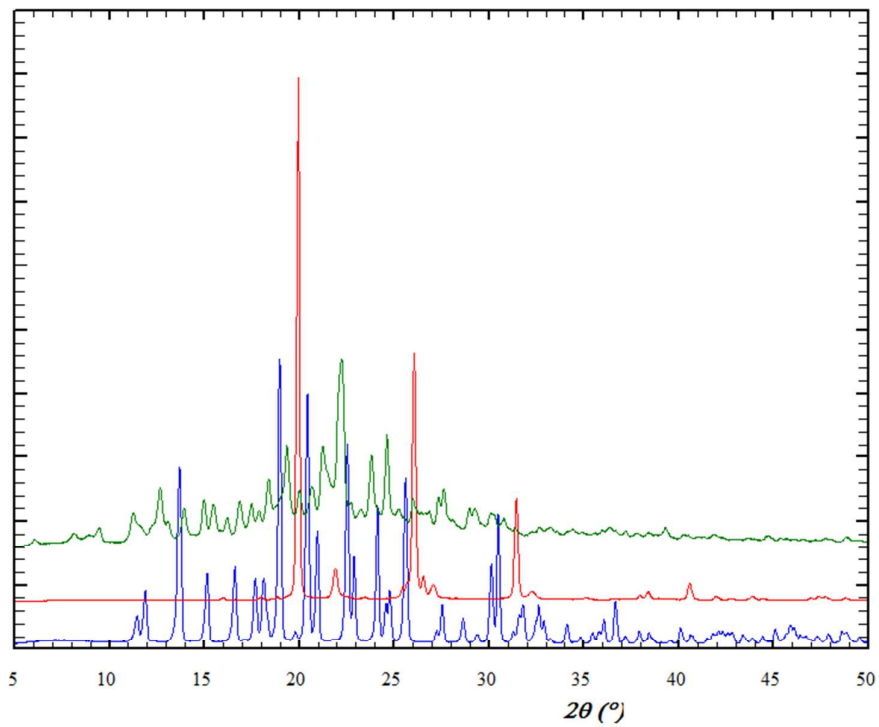

Figure S5: PXRD pattern of AMX (Blue), Succinic acid (Red), AMX-Succinic acid salt (Green)

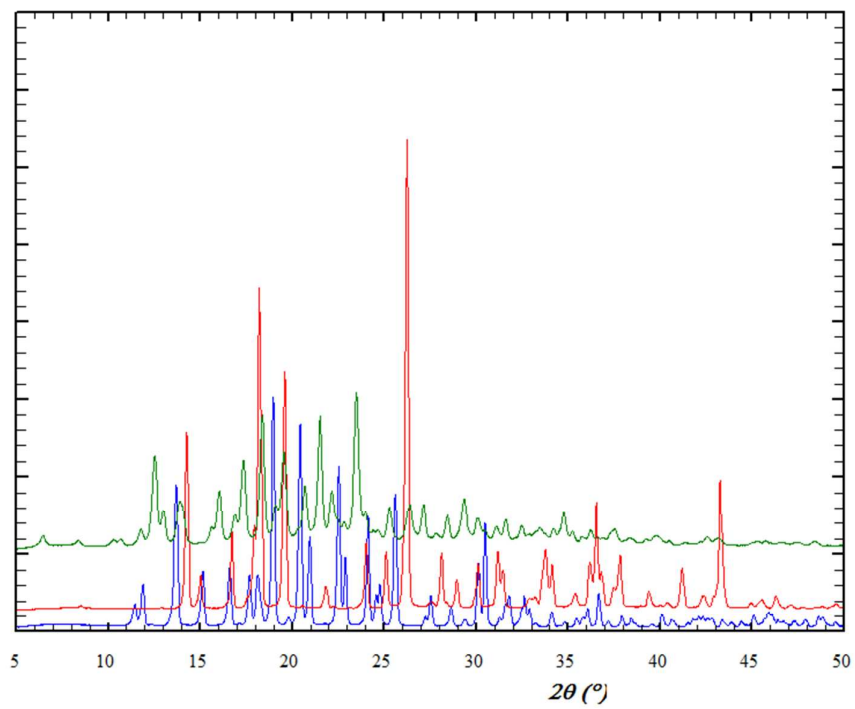

Figure S6: PXRD pattern of AMX (Blue), Citric acid (Red), AMX-Citric acid salt (Green)

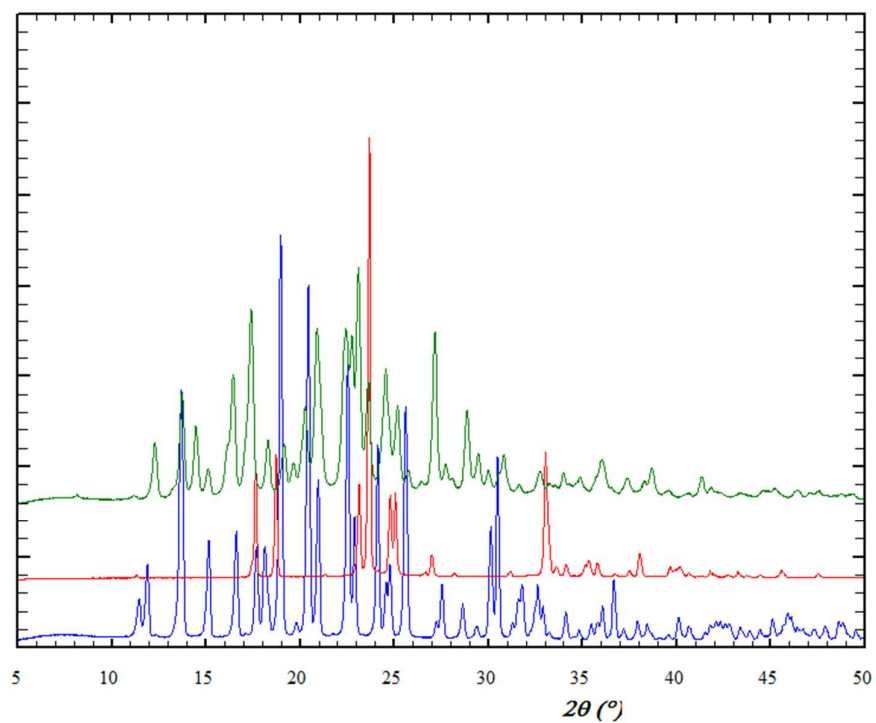

Figure S7: PXRD pattern of AMX (Blue), Malonic acid (Red), AMX-Malonic acid salt (Green)

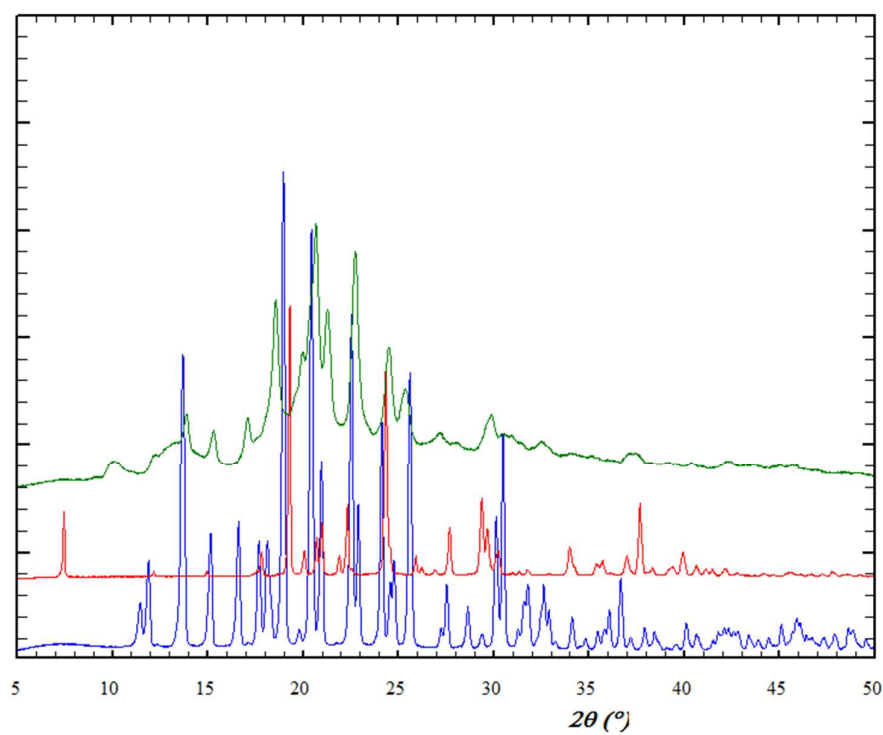

Figure S8: PXRD pattern of AMX (Blue), L-Malic acid (Red), AMX-L-Malic acid salt (Green)

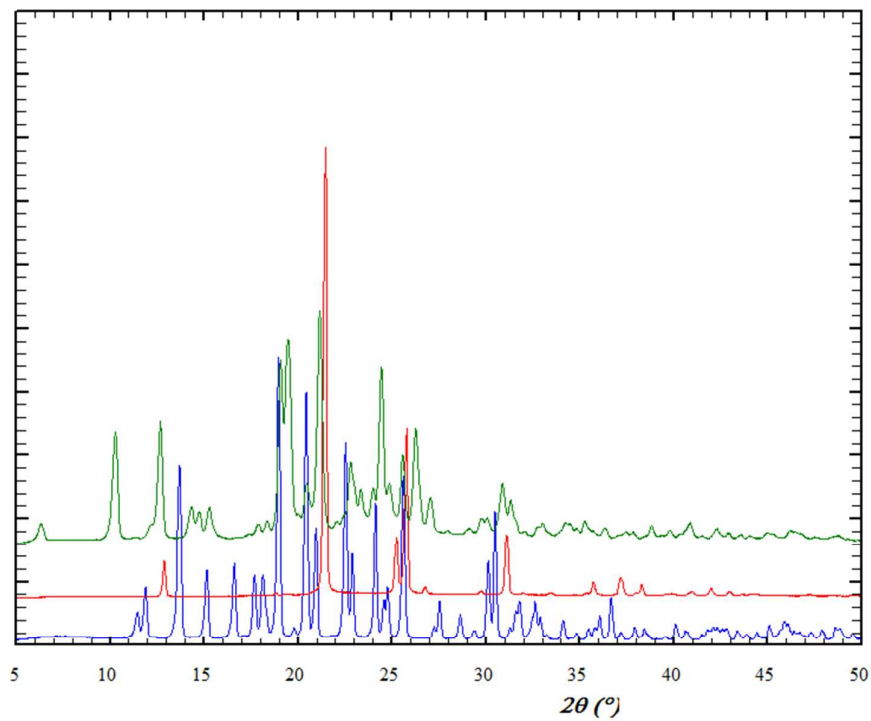

Figure S9: PXRD pattern of AMX (Blue), Adipic acid (Red), AMX-Adipic acid salt (Green)

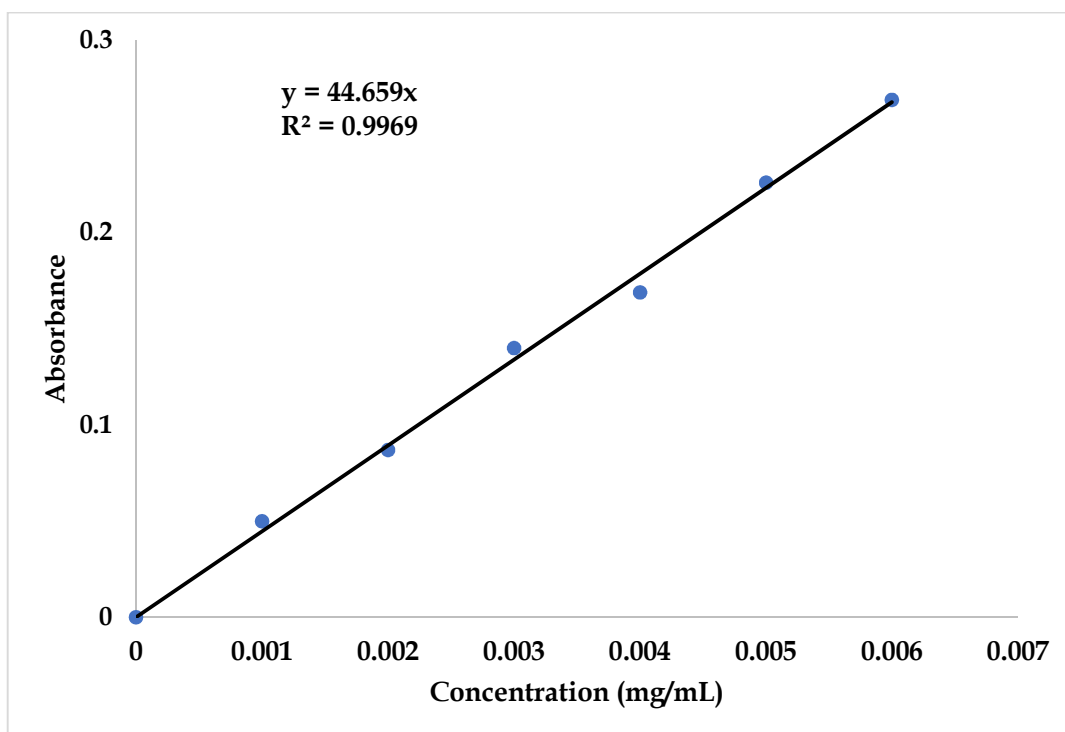

Figure S10: Calibration curve of AMX in water at 209 nm wavelength

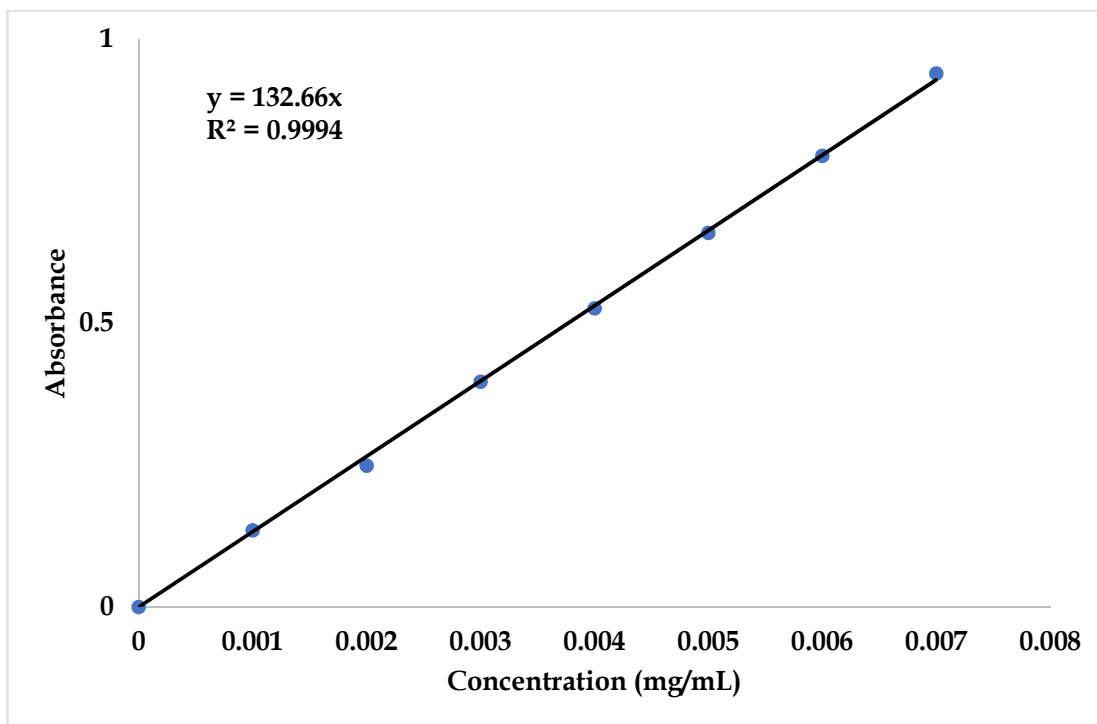

Figure S11: Calibration curve of AMX- D(-)Tartaric acid salt in water at 209 nm wavelength

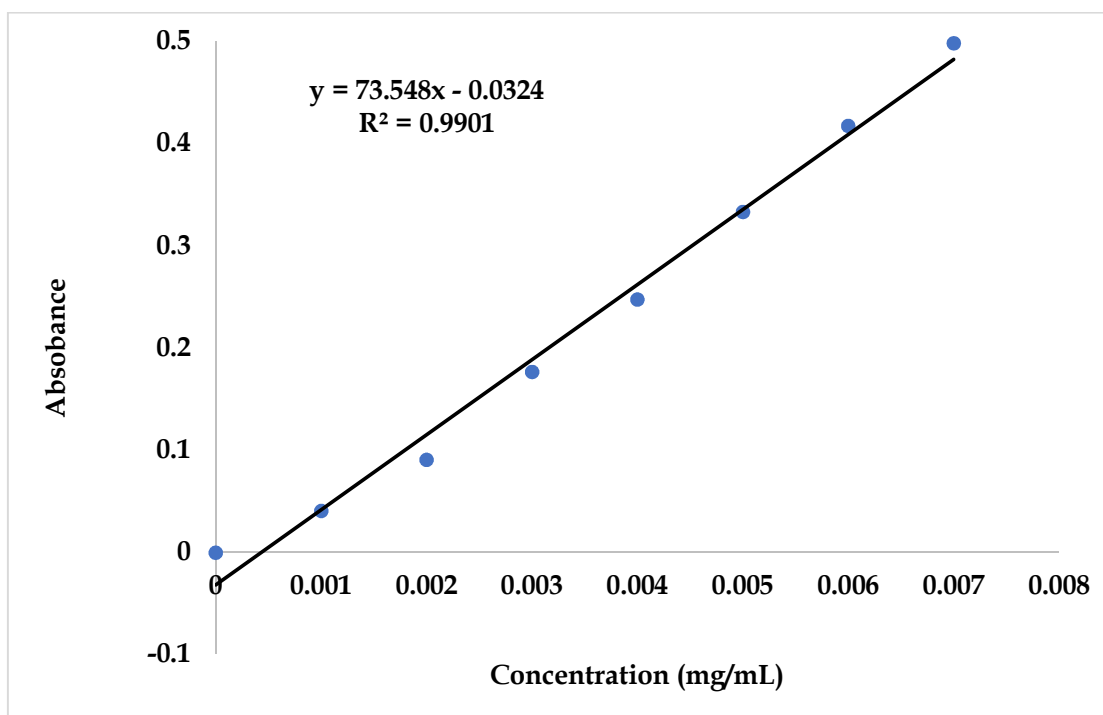

Figure S12: Calibration curve of AMX- Fumaric acid salt in water at 209 nm wavelength

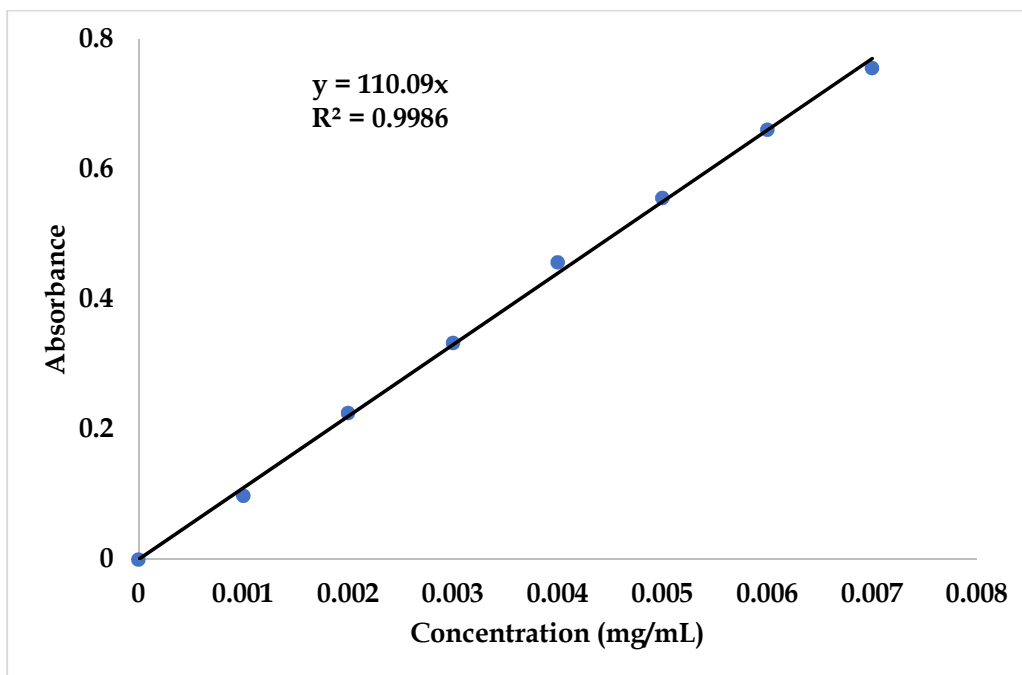

Figure S13: Calibration curve of AMX- D(+)-Tartaric acid salt in water at 209 nm wavelength

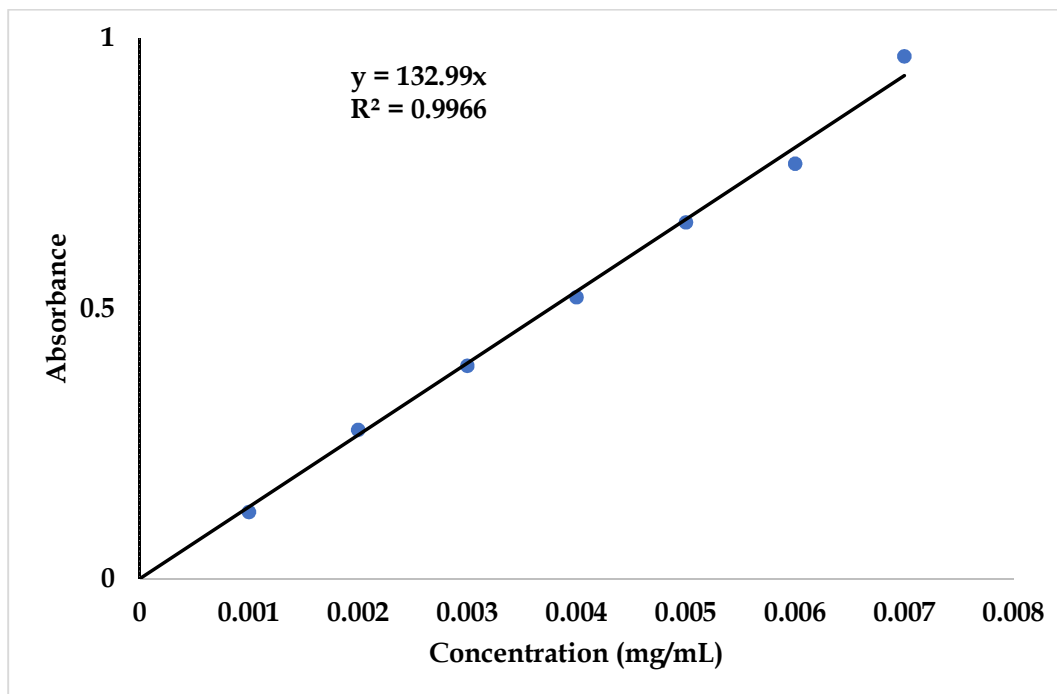

Figure S14: Calibration curve of AMX- Maleic acid salt in water at 209 nm wavelength



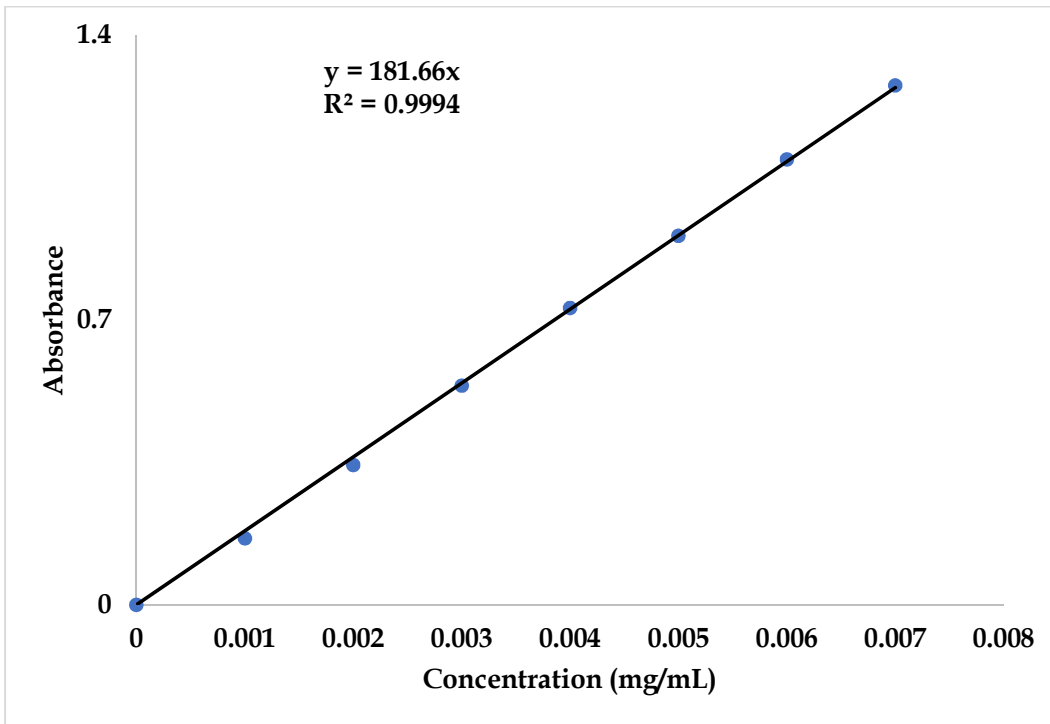

Figure S15: Calibration curve of AMX- Succinic acid salt in water at 209 nm wavelength

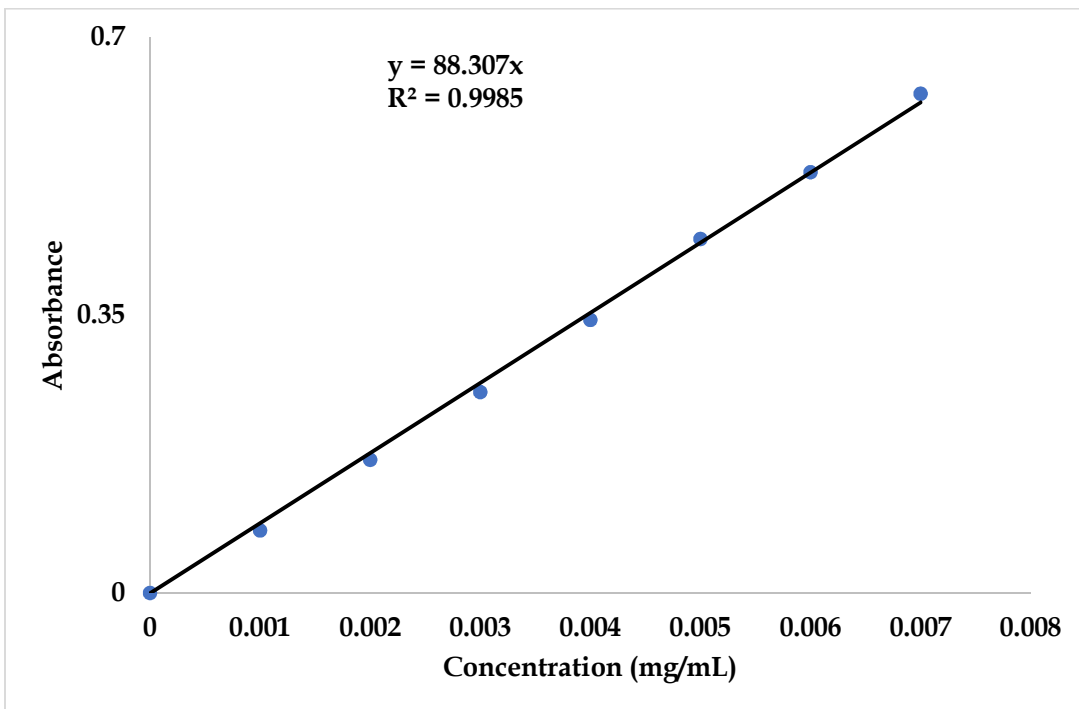

Figure S16: Calibration curve of AMX- Citric acid salt in water at 209 nm wavelength

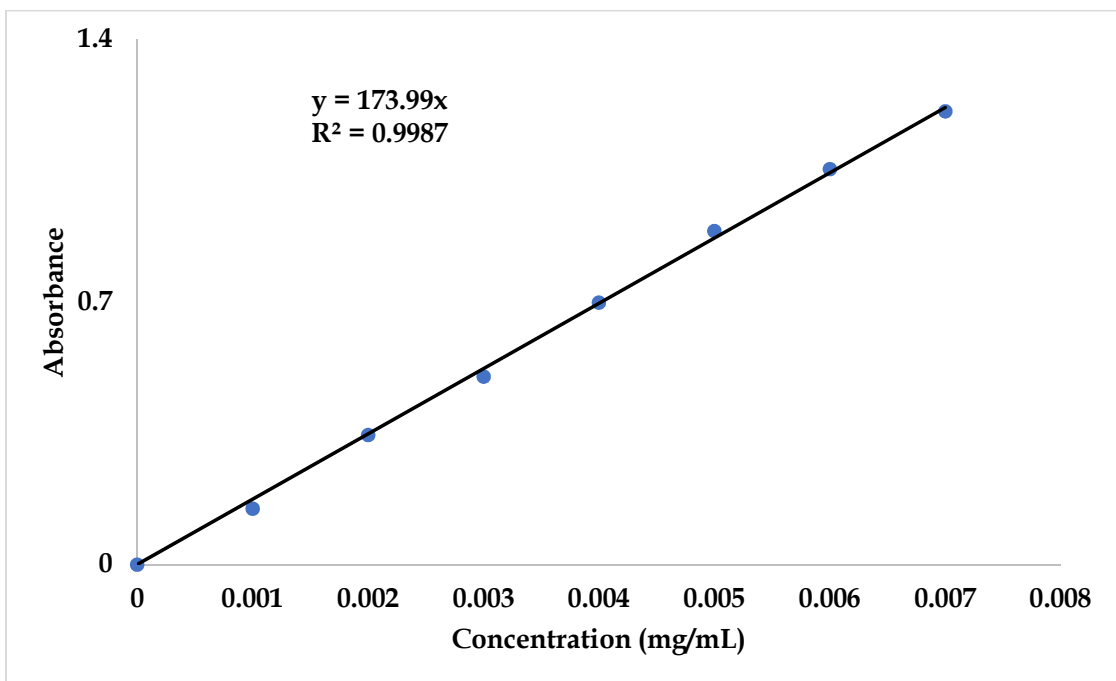

Figure S17: Calibration curve of AMX- Malonic acid salt in water at 209 nm wavelength

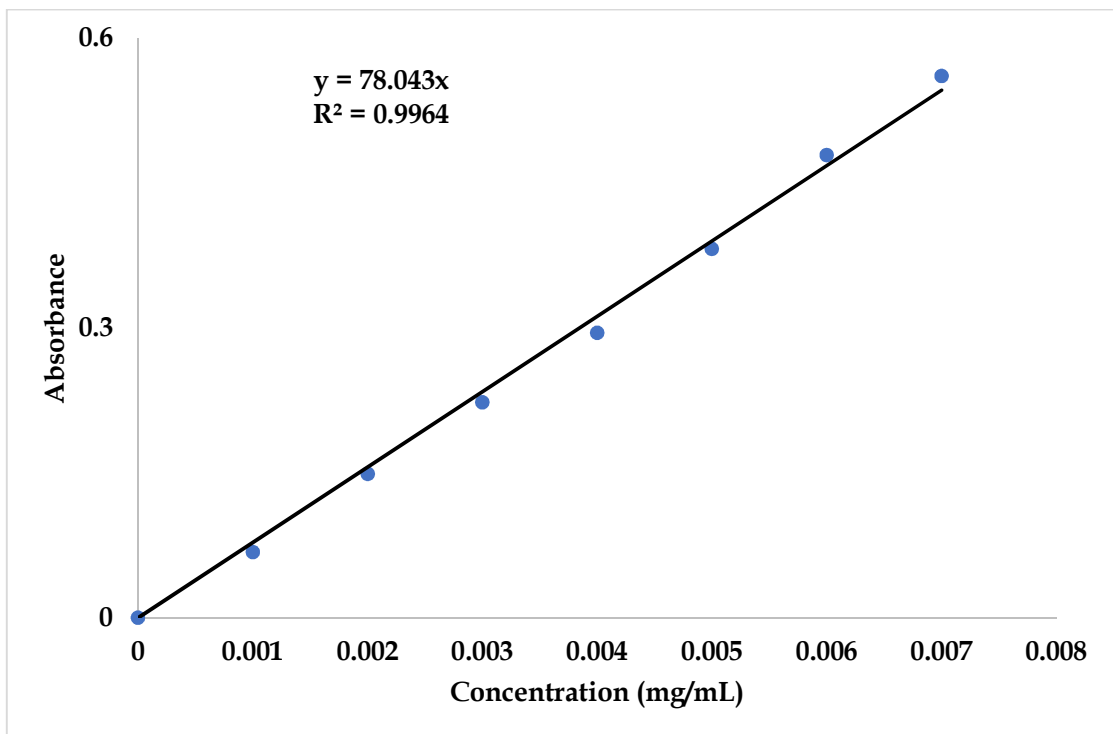

Figure S18: Calibration curve of AMX- L-Malic acid salt in water at 209 nm wavelength

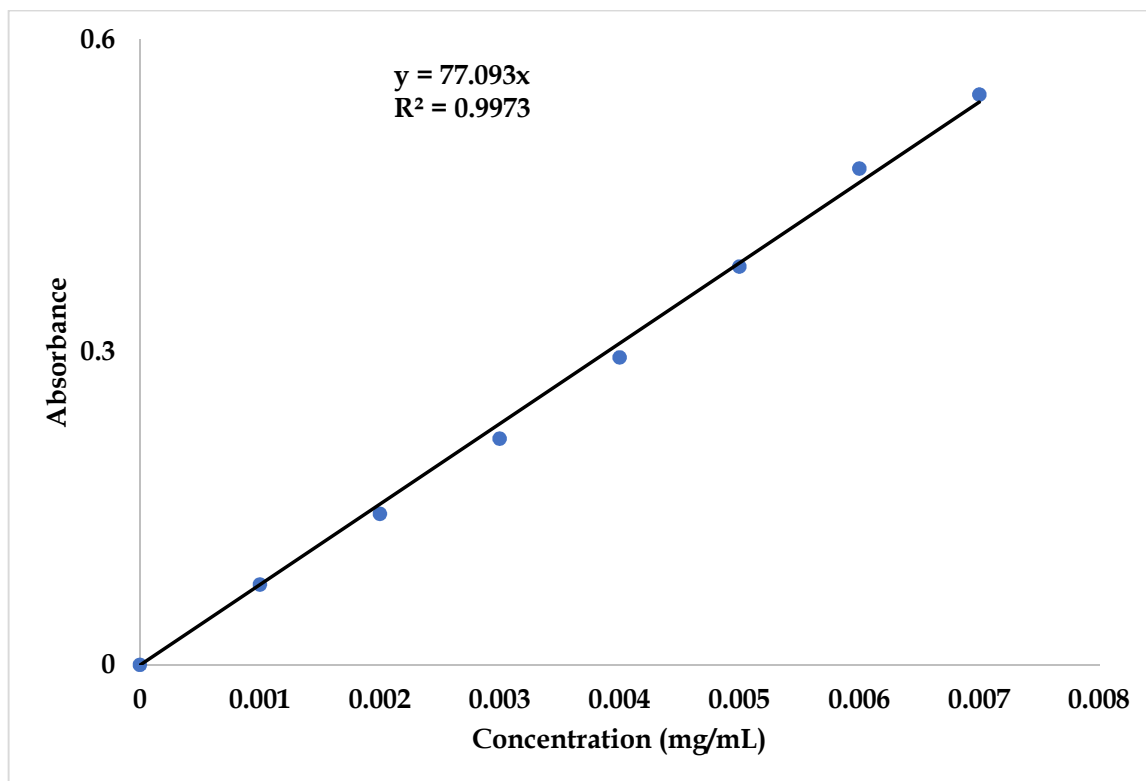

Figure S19: Calibration curve of AMX- Adipic acid salt in water at 209 nm wavelength

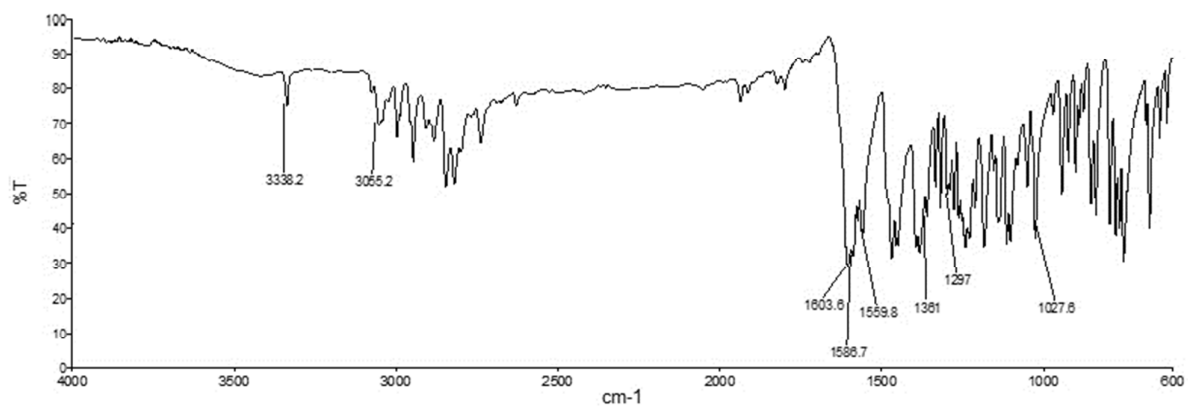

Figure S20: FTIR pattern of AMX

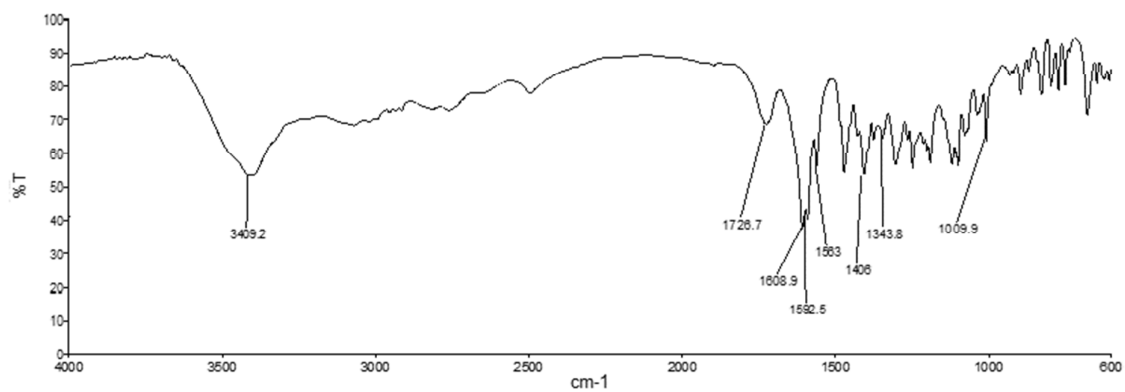

Figure S21: FTIR pattern of AMX- D(-)Tartaric acid salt

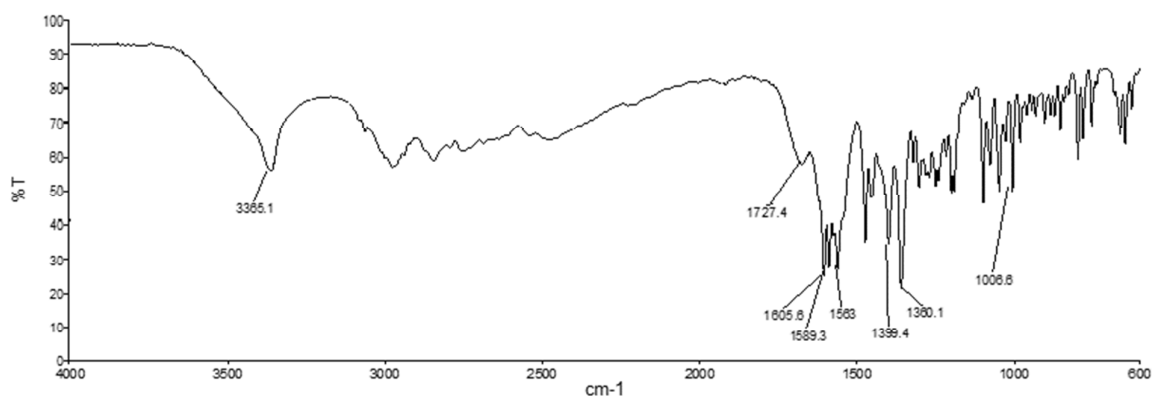

Figure S22: FTIR pattern of AMX- Fumaric acid salt

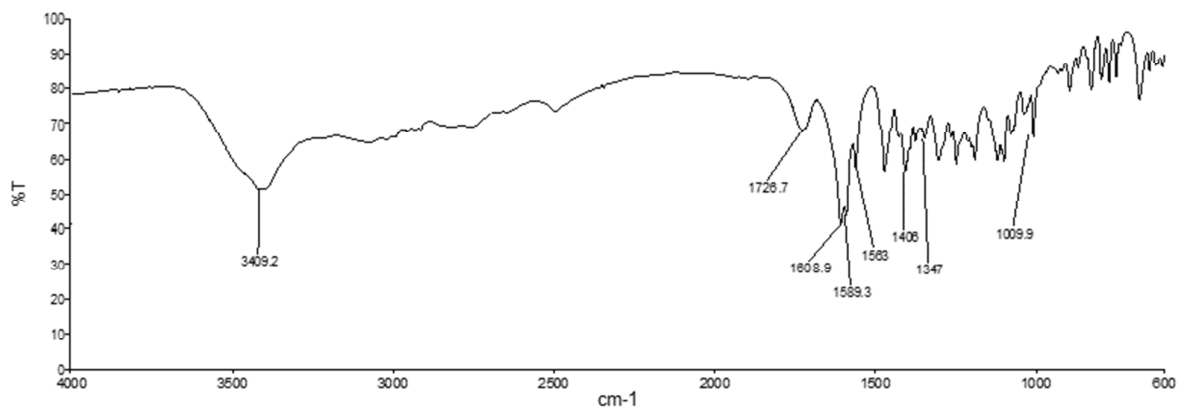

Figure S23: FTIR pattern of AMX- D(+)Tartaric acid salt

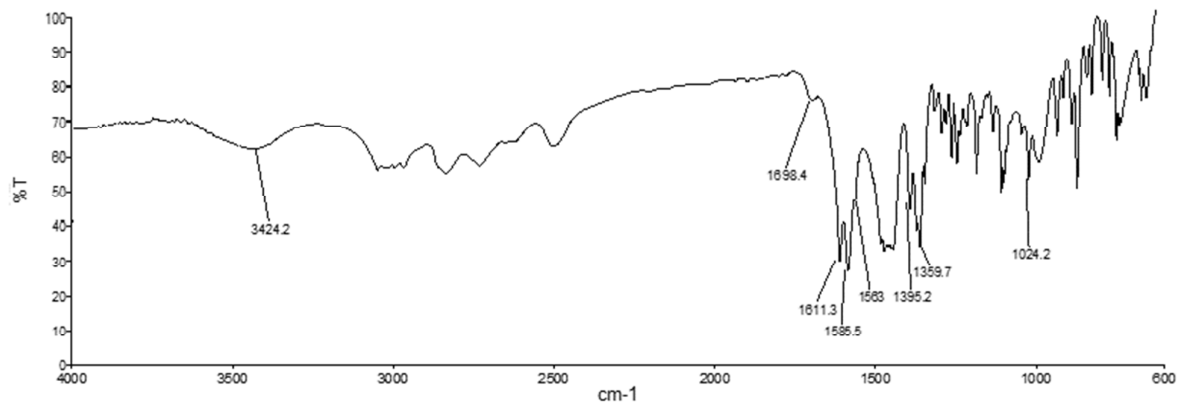

Figure S24: FTIR pattern of AMX- Maleic acid salt

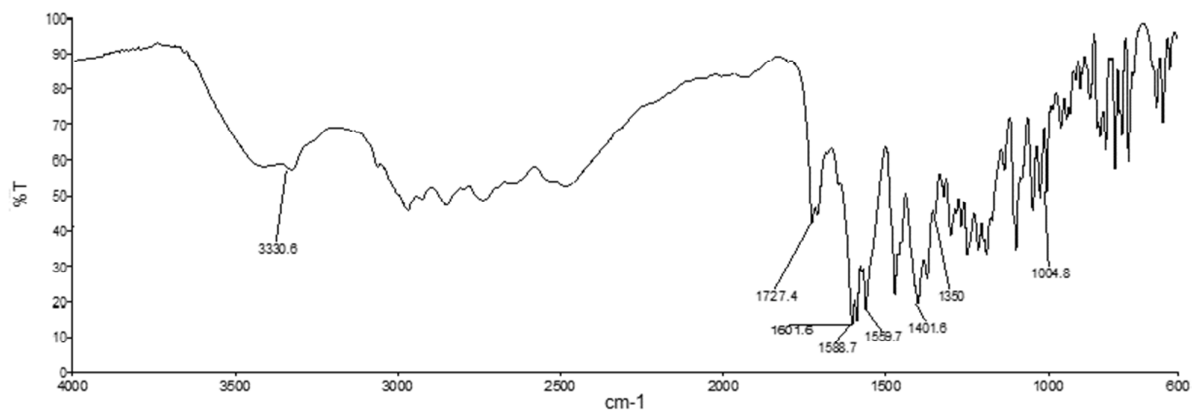

Figure S25: FTIR pattern of AMX- Succinic acid salt

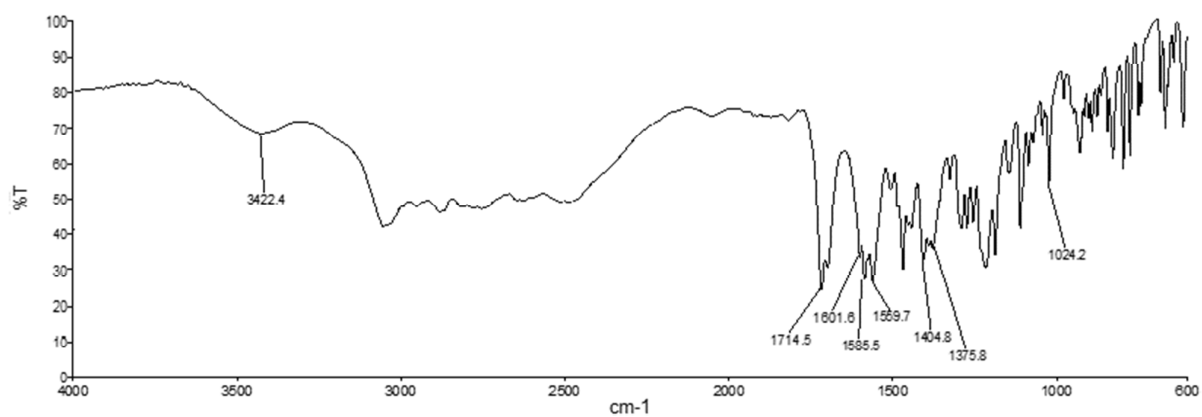

Figure S26: FTIR pattern of AMX- Citric acid salt

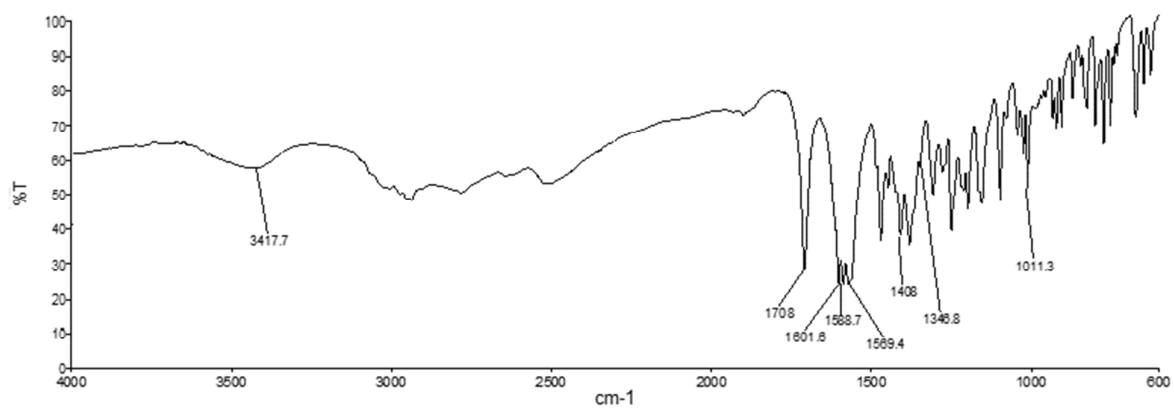

Figure S27: FTIR pattern of AMX- Malonic acid salt

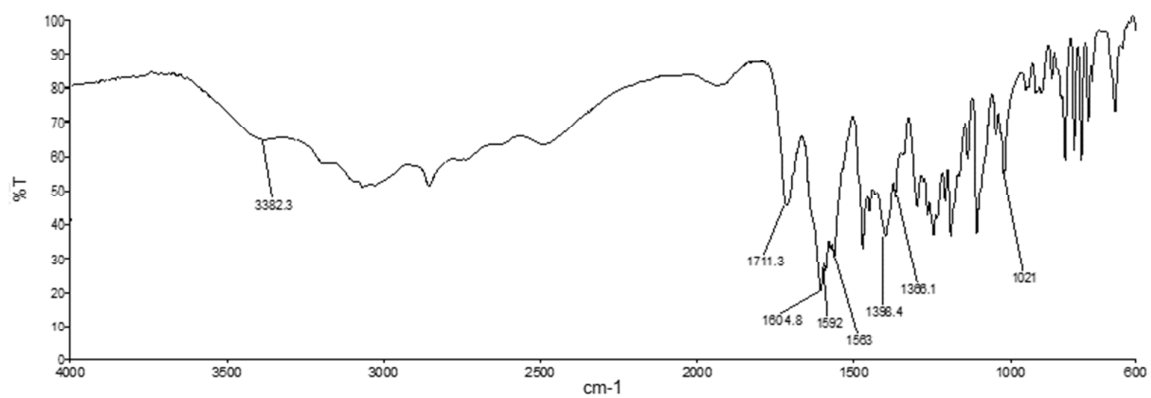

Figure S28: FTIR pattern of AMX- L-Malic acid salt

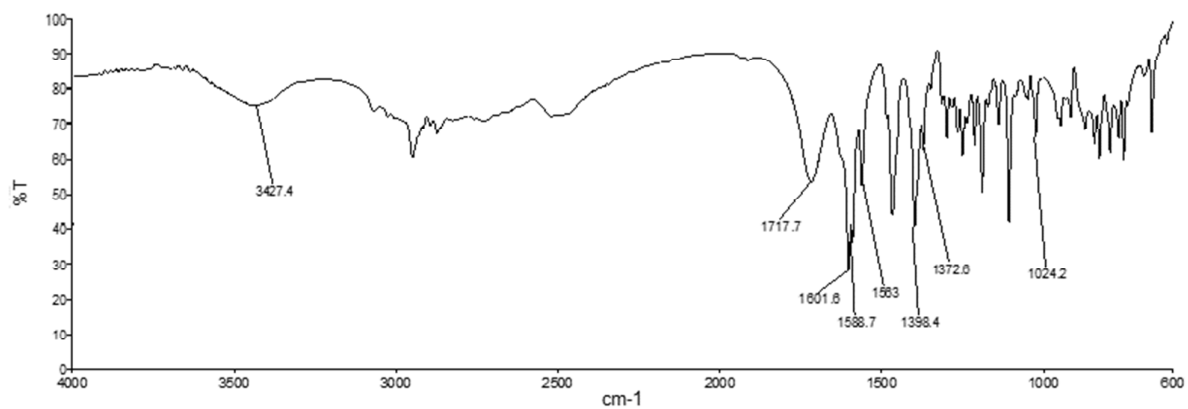

Figure S29: FTIR pattern of AMX- Adipic acid salt

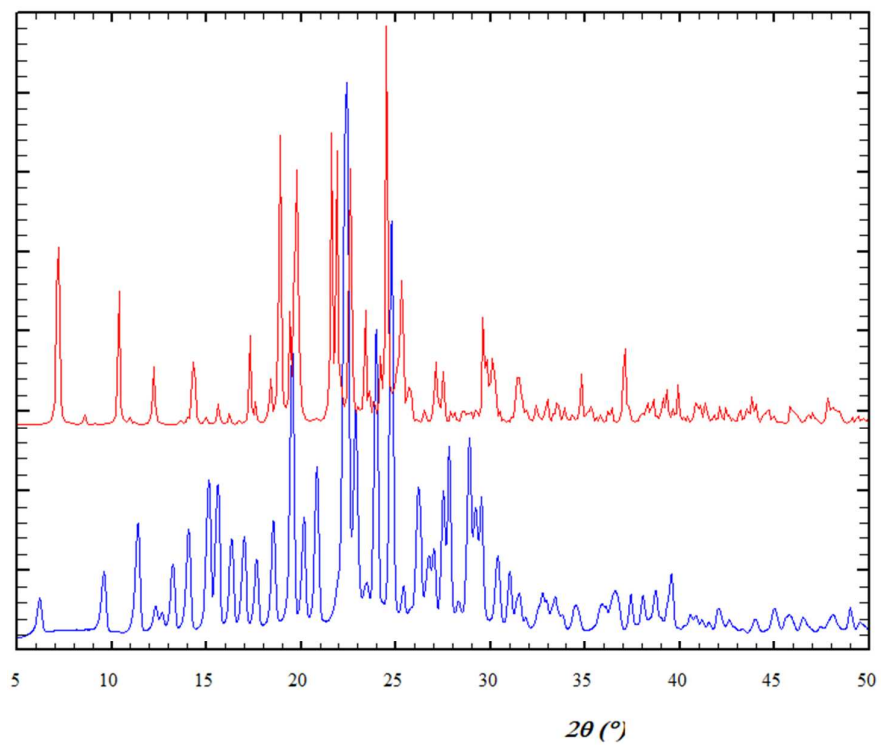

Figure S30: PXRD pattern of AMX-Fumaric acid (Blue), Simulated powder pattern of AMX-Fumaric acid (Red)

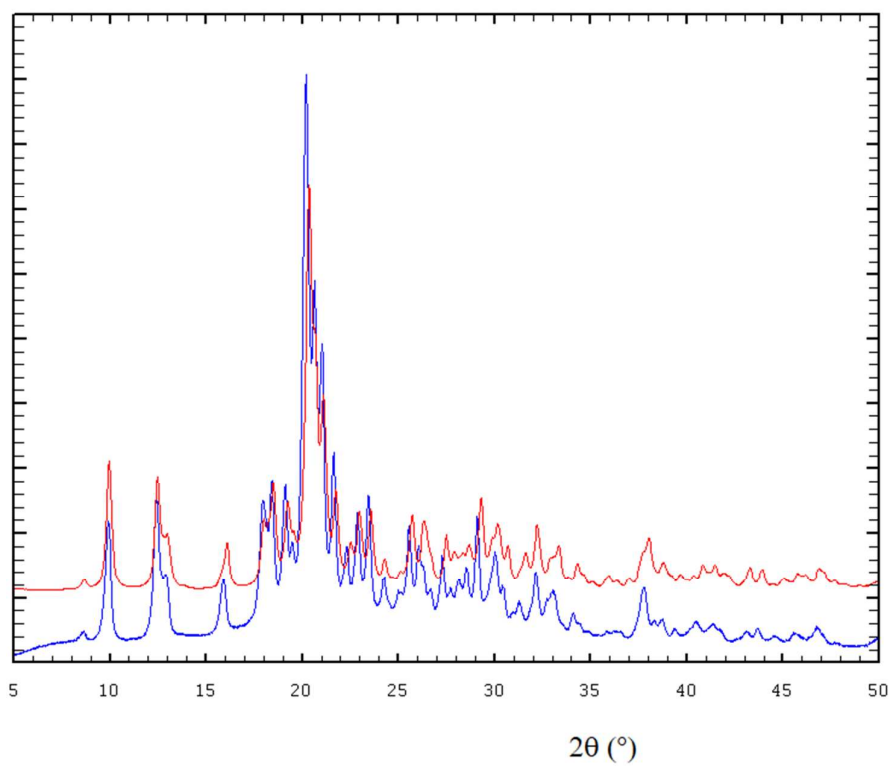

Figure S31: PXRD pattern of AMX-Maleic acid (Blue), Simulated powder pattern of AMX-Maleic acid (Red)

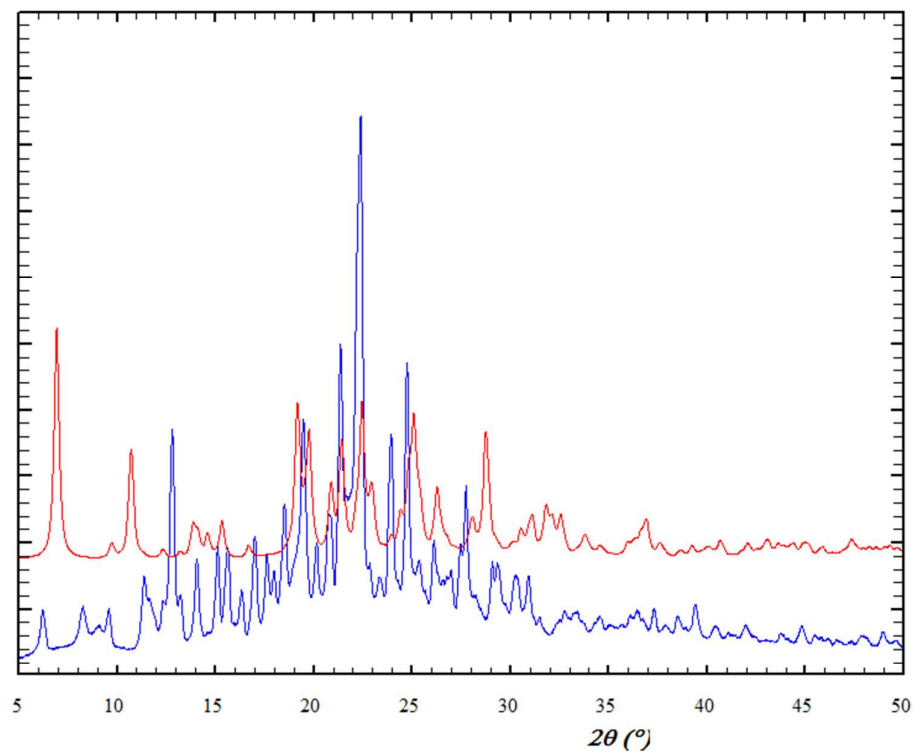

Figure S32: PXRD pattern of AMX-Succinic acid (Blue), Simulated powder pattern of AMX-Succinic acid (Red)

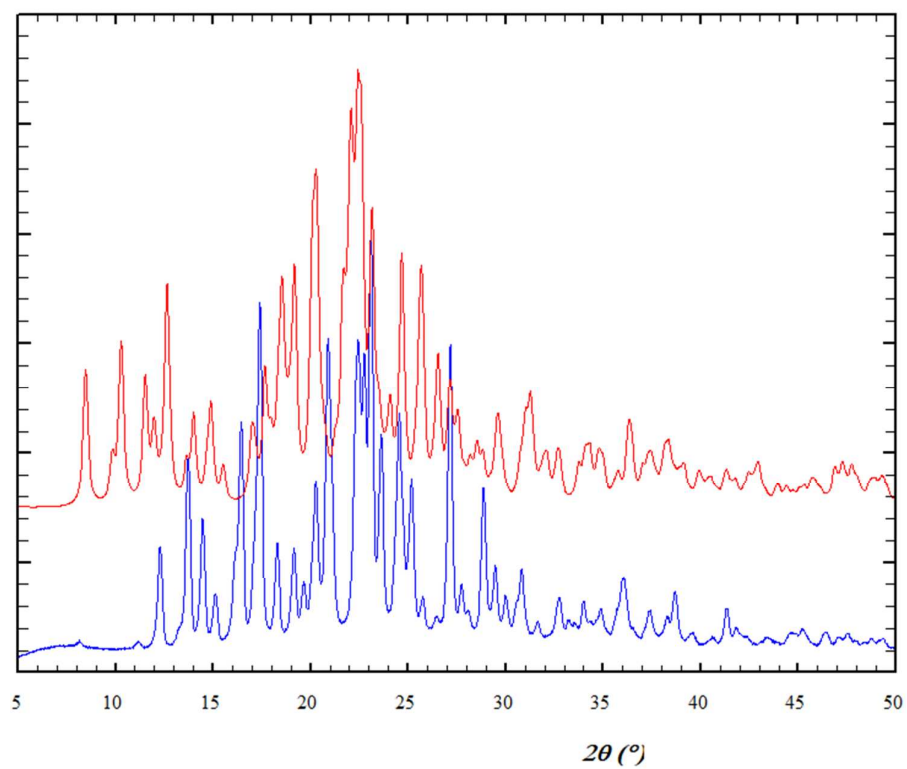

Figure S33: PXRD pattern of AMX-Malonic acid (Blue), Simulated powder pattern of AMX-Malonic acid (Red)



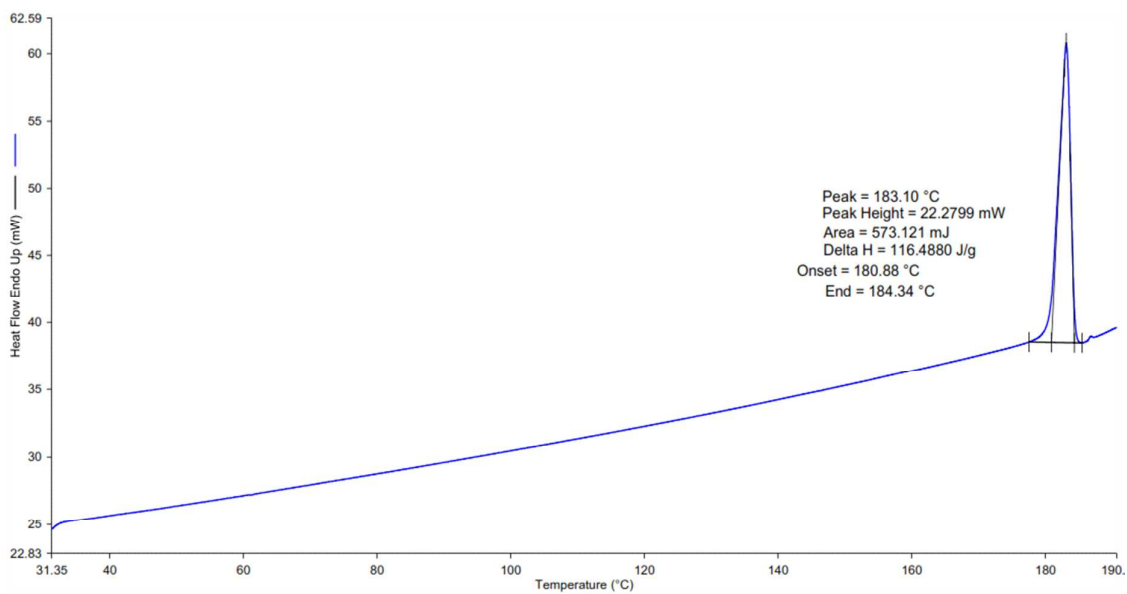

Figure S34: DSC thermogram of AMX

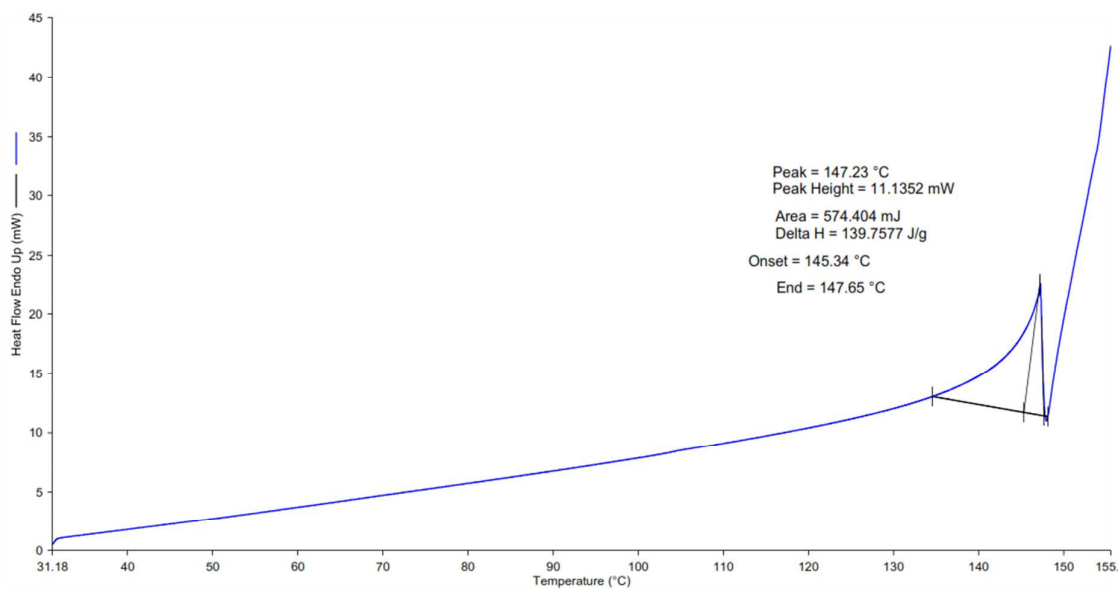

Figure S35: DSC thermogram of AMX salt with D(-)-Tartaric acid

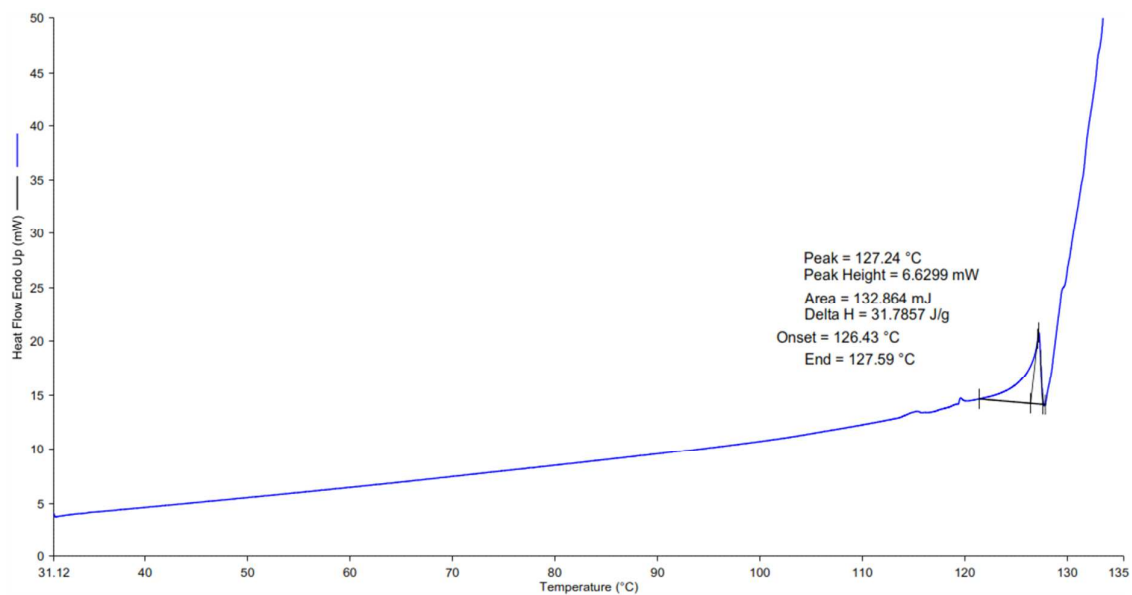

Figure S36: DSC thermogram of AMX salt with Fumaric acid

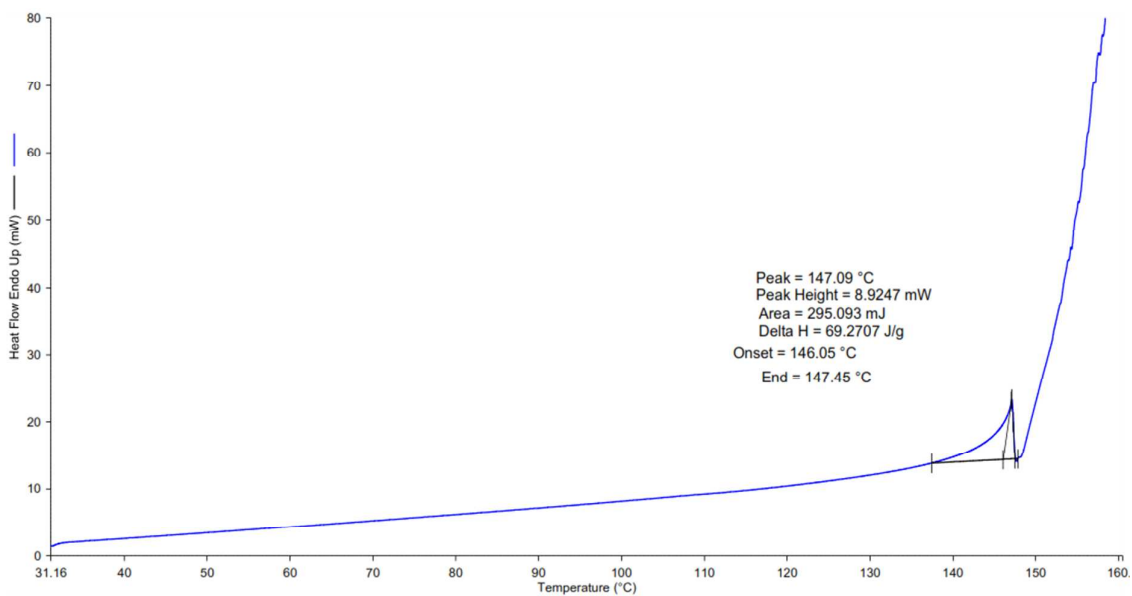

Figure S37: DSC thermogram of AMX salt with D(+) Tartaric acid

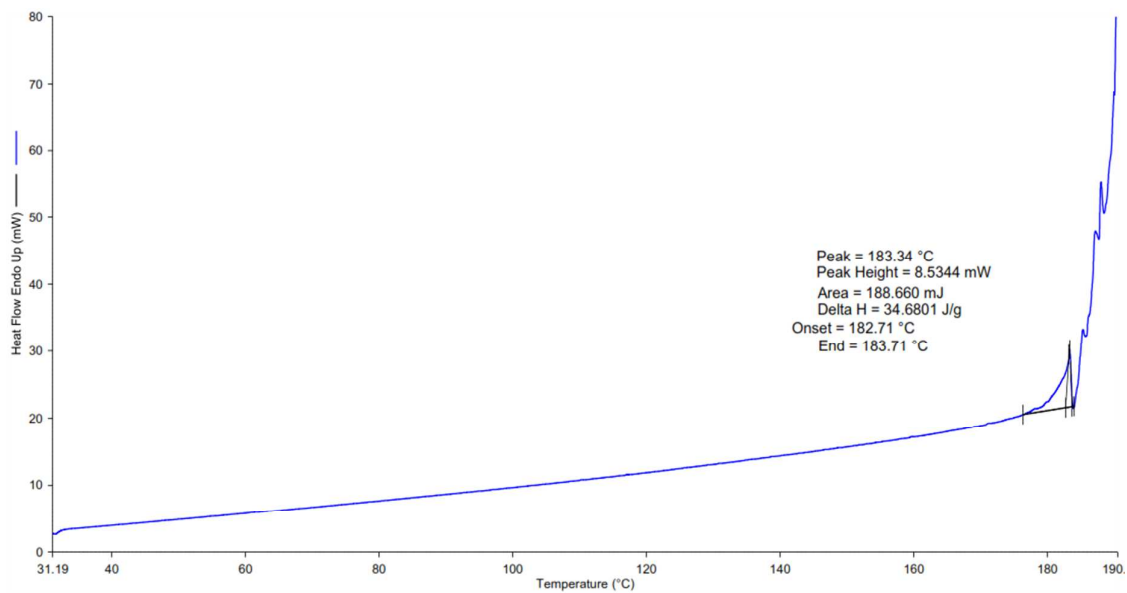

Figure S38: DSC thermogram of AMX salt with Maleic acid

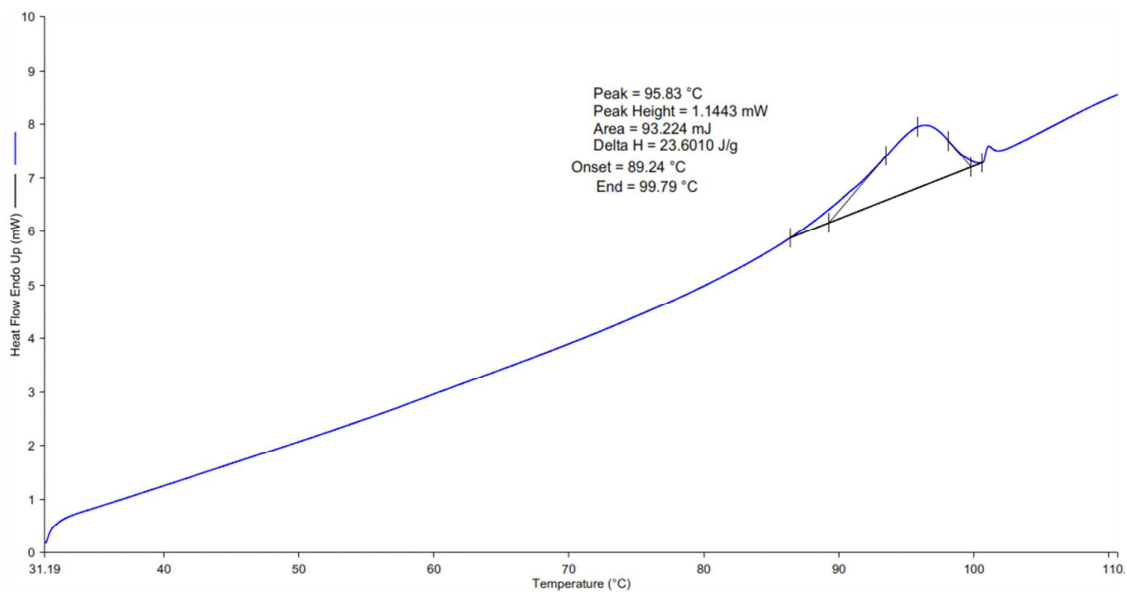

Figure S39: DSC thermogram of AMX salt with Succinic acid

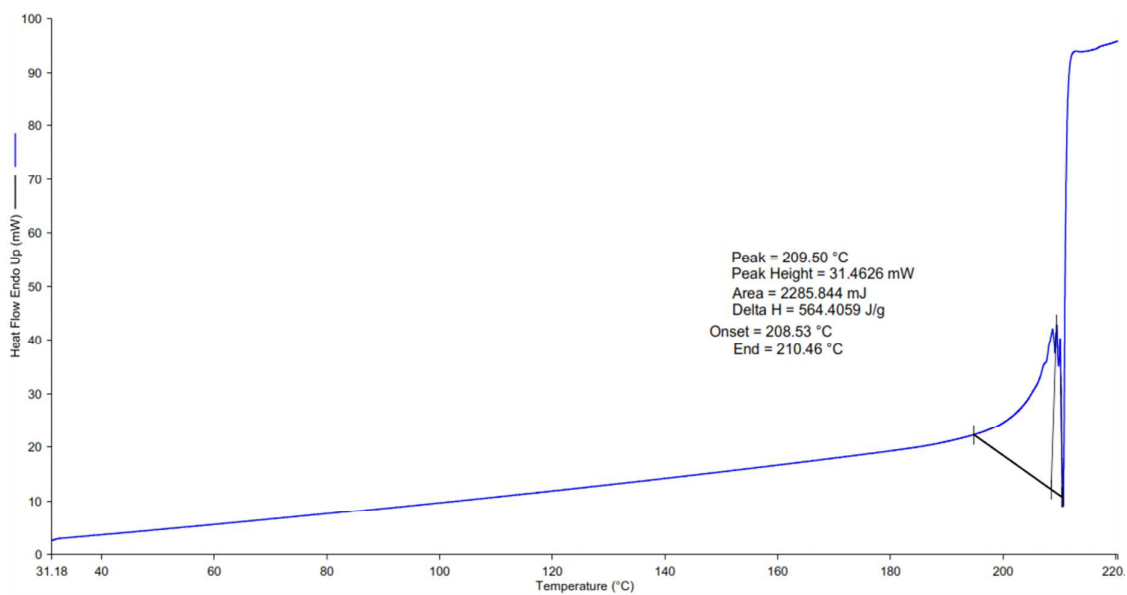

Figure S40: DSC thermogram of AMX salt with Citric acid

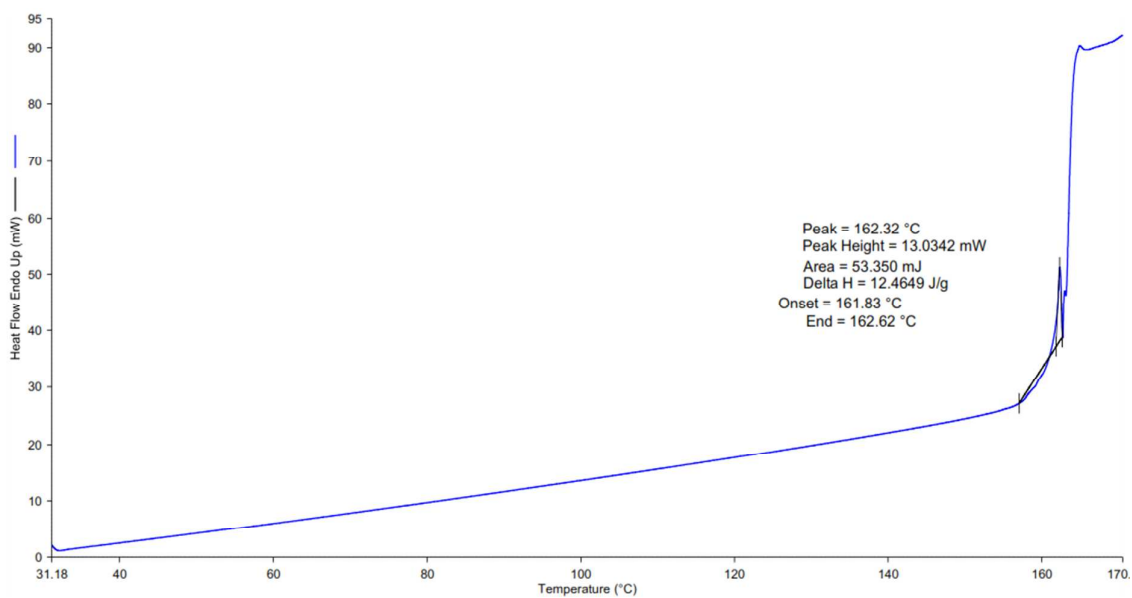

Figure S41: DSC thermogram of AMX salt with Malonic acid

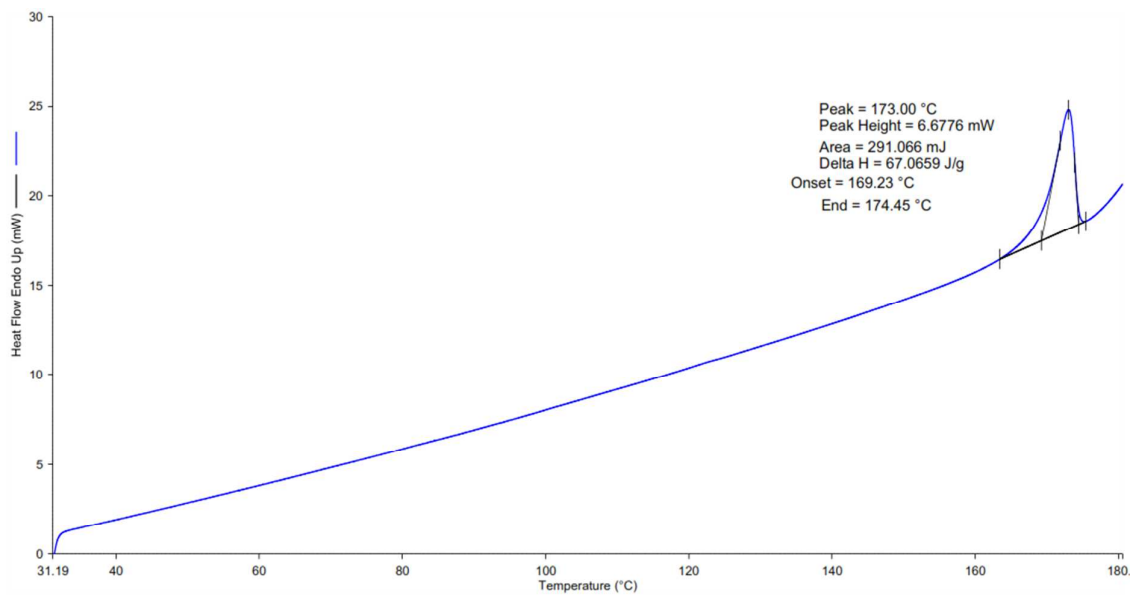

Figure S42: DSC thermogram of AMX salt with L-Malic acid

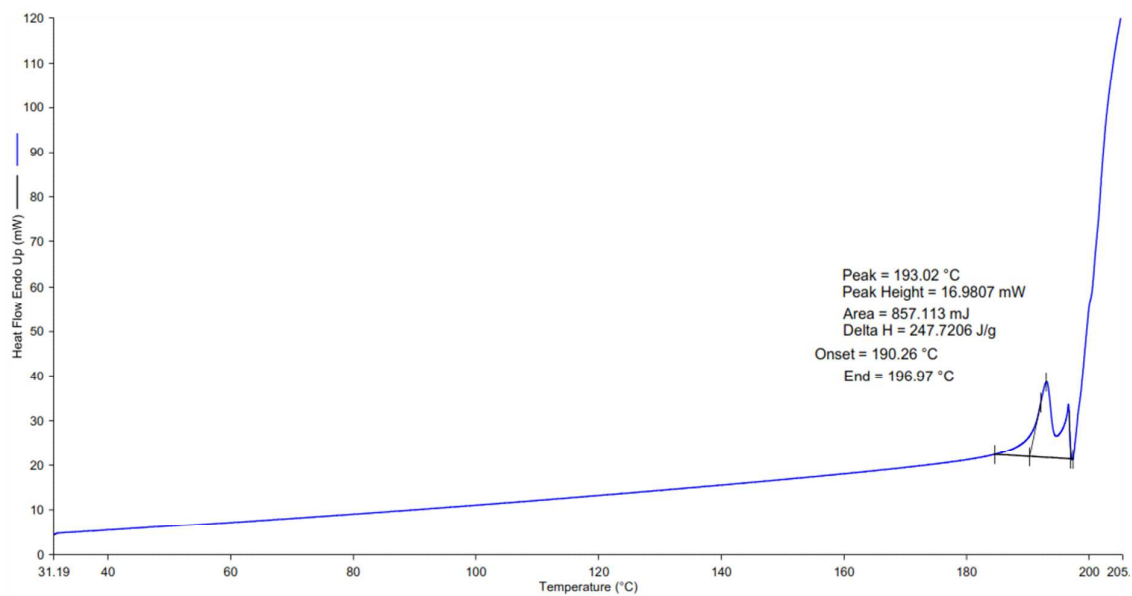

Figure S43: DSC thermogram of AMX salt with Adipic acid

**Table S1:** FT-IR data of AMX and its salts

| <b>Compound</b>          | <b>N-H stretch<br/>cm<sup>-1</sup></b> | <b>N-H bend cm<sup>-1</sup></b> | <b>C-N cm<sup>-1</sup></b> | <b>COO-<br/>asymmetric<br/>cm<sup>-1</sup></b> | <b>COO-<br/>symmetric<br/>cm<sup>-1</sup></b> | <b>C=O<br/>stretch<br/>cm<sup>-1</sup></b> |
|--------------------------|----------------------------------------|---------------------------------|----------------------------|------------------------------------------------|-----------------------------------------------|--------------------------------------------|
| AMX                      | 3338.2                                 | 1603.6, 1559.8                  | 1361.0, 1027.6             |                                                |                                               |                                            |
| AMX: D (-) tartaric acid | 3409.2                                 | 1608.9, 1563.0                  | 1343.8, 1009.9             | 1592.5                                         | 1406.0                                        | 1726.7                                     |
| AMX: Fumaric acid        | 3365.1                                 | 1605.6, 1563.0                  | 1360.1, 1006.6             | 1589.3                                         | 1399.4                                        | 1727.4                                     |
| AMX: D (+) tartaric acid | 3409.2                                 | 1608.9, 1563.0                  | 1347.0, 1009.9             | 1589.3                                         | 1406.0                                        | 1726.7                                     |
| AMX: Maleic acid         | 3424.2                                 | 1611.3, 1563.0                  | 1359.7, 1024.2             | 1585.5                                         | 1395.2                                        | 1698.4                                     |
| AMX: Succinic acid       | 3330.6                                 | 1601.6, 1559.7                  | 1350.0, 1004.8             | 1588.7                                         | 1401.6                                        | 1727.4                                     |
| AMX: Citric acid         | 3422.4                                 | 1601.6, 1559.7                  | 1375.8, 1024.2             | 1585.5                                         | 1404.8                                        | 1714.5                                     |
| AMX: Malonic acid        | 3417.7                                 | 1601.6, 1569.4                  | 1346.8, 1011.3             | 1588.7                                         | 1406.0                                        | 1708.0                                     |
| AMX: L-Malic acid        | 3382.3                                 | 1604.8, 1563.0                  | 1366.1, 1021.0             | 1592.0                                         | 1398.4                                        | 1711.3                                     |
| AMX: Adipic acid         | 3427.4                                 | 1601.6, 1563.0                  | 1372.6, 1024.2             | 1588.7                                         | 1398.4                                        | 1717.7                                     |
